# Supplementary material for: The evolution of sex determination associated with a chromosomal inversion
Source: PubMed Central journal article supplement (PMC6329827; doi:10.1038/s41467-018-08014-y), 2019-01-11
Supplement: 41467_2018_8014_MOESM1_ESM.pdf [file 41467_2018_8014_MOESM1_ESM.pdf]

## **Supplementary Information**

**The evolution of sex determination associated with a chromosomal inversion**

**Natri *et al.***

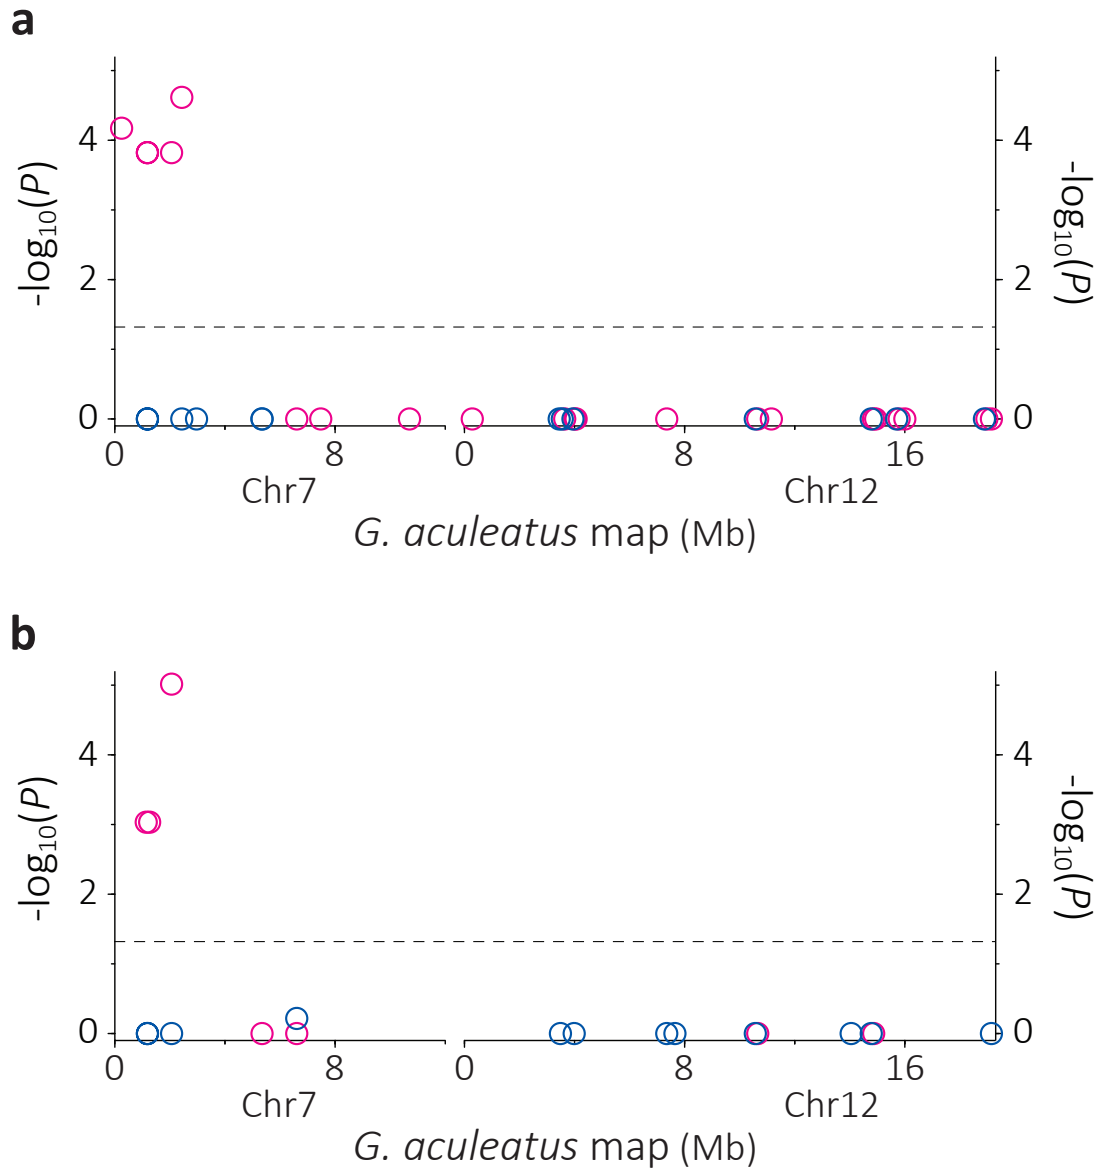

**Supplementary Figure 1 | Association between sex and loci in the region corresponding to LG12. (a)**  $F_1$  hybrids between a JO female and a JF male. **(b)**  $F_1$  hybrids between a JF female and a JB male. Maternally and paternally segregating alleles are indicated in red and blue, respectively.

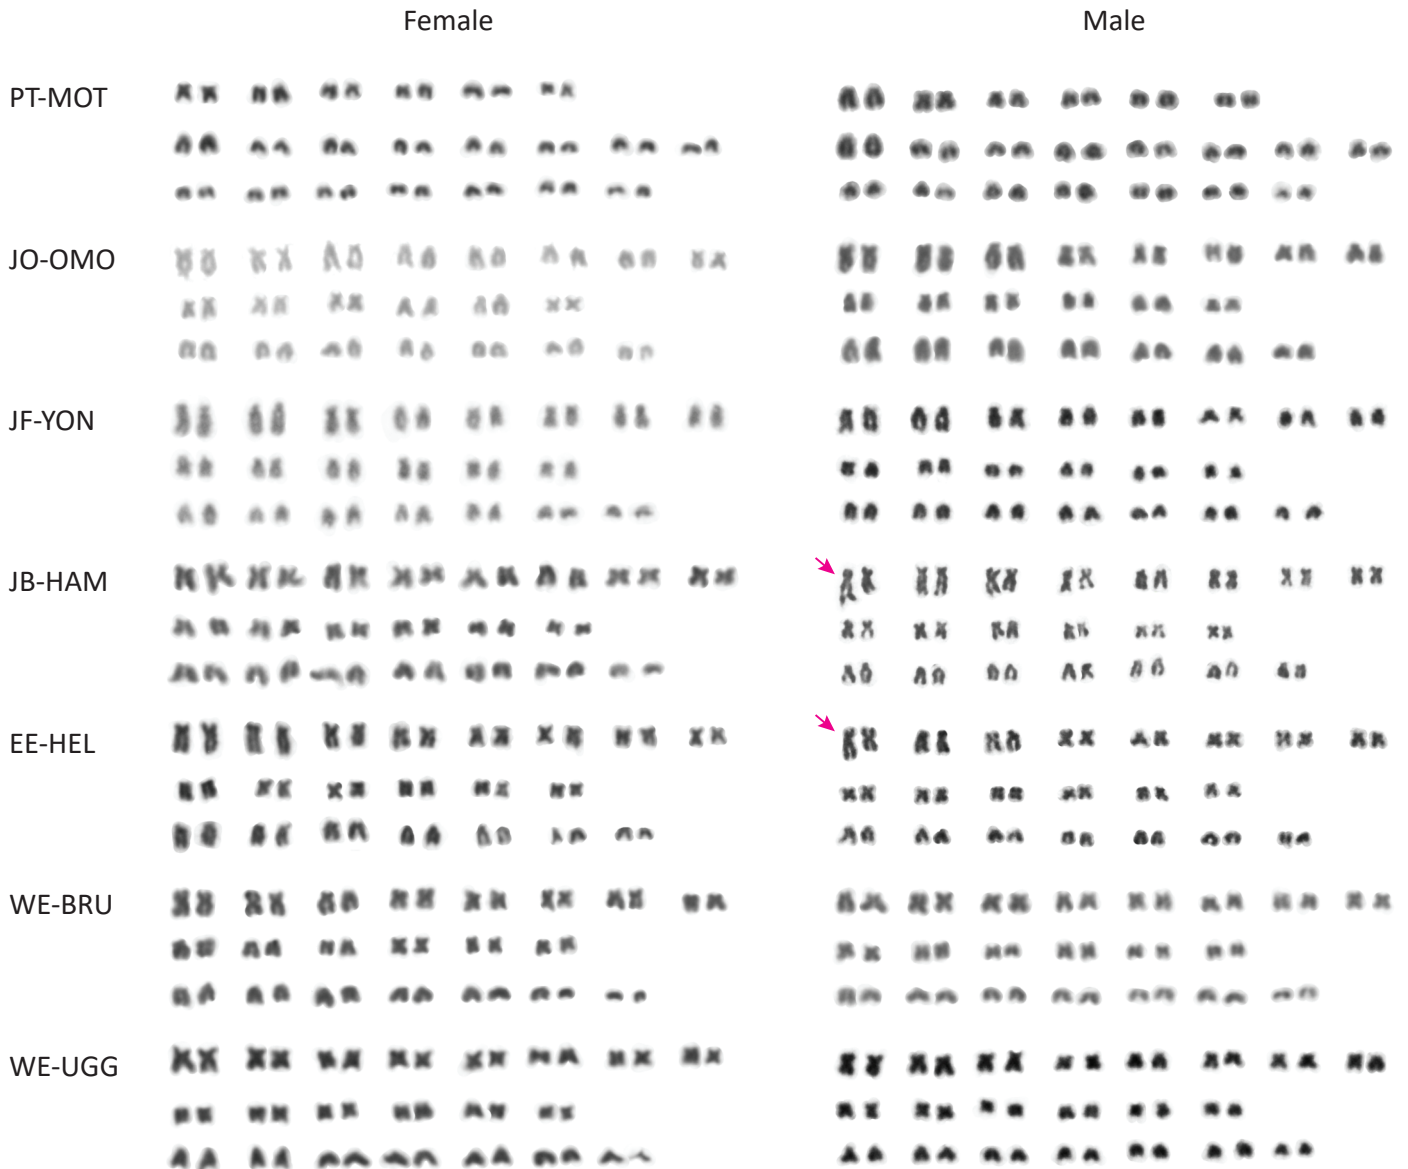

**Supplementary Figure 2 | Karyotypes in *Pungitius* populations.** Karyotypes of females (left) and males (right) in seven populations from six *Pungitius* lineages (PT, JO, JF, JB, EE and WE) are shown. Red arrows indicate large, male-specific chromosomes.

**Supplementary Table 1 | Lineages and sampling sites of 29 *Pungitius* populations used in this study.**

| Lineage                 | Population ID | Sampling site                         | Coordinates           |
|-------------------------|---------------|---------------------------------------|-----------------------|
| <i>P. tymensis</i>      | PT-MOT        | Motosakimui River, Shibetsu, Japan    | 43° 50' N, 145° 05' E |
| <i>P. tymensis</i>      | PT-OBO        | Oboro River basin, Akkeshi, Japan     | 43° 02' N, 144° 44' E |
| Japanese Omono          | JO-OMO        | Omono River basin, Daisen, Japan      | 39° 25' N, 140° 33' E |
| Japanese freshwater     | JF-SHI        | Shibetsu River, Nakashibetsu, Japan   | 43° 37' N, 145° 04' E |
| Japanese freshwater     | JF-SOM        | Shiomi River, Akkeshi, Japan          | 43° 02' N, 144° 51' E |
| Japanese freshwater     | JF-OBO        | Oboro River basin, Akkeshi, Japan     | 43° 02' N, 144° 44' E |
| Japanese freshwater     | JF-KIE        | Kievka River, Kievka, Russia          | 42° 53' N, 133° 39' E |
| Japanese freshwater     | JF-YON        | Yoneshiro River, Odate, Japan         | 40° 16' N, 140° 29' E |
| Japanese freshwater     | JF-TAI        | Tainai River basin, Tainai, Japan     | 38° 06' N, 139° 24' E |
| Japanese brackish-water | JB-BLS        | Bolshaya River, Kamchatka, Russia     | 52° 45' N, 156° 15' E |
| Japanese brackish-water | JB-HAM        | Hamanaka Bay, Hamanaka, Japan         | 43° 05' N, 145° 07' E |
| Japanese brackish-water | JB-SOM        | Shiomi River, Akkeshi, Japan          | 43° 02' N, 144° 51' E |
| Japanese brackish-water | JB-WAT        | Watari-Chirippu pond, Hamanaka, Japan | 43° 02' N, 145° 03' E |
| Eastern North American  | EA-BAF        | Baffin Island, Canada                 | 62° 52' N, 67° 21' W  |
| Central North American  | CA-FLO        | Floatingstone Lake, Alberta, Canada   | 54° 14' N, 111° 38' W |
| Eastern European        | EE-L1         | Lake 1, Norrbotten, Sweden            | 67° 54' N, 20° 51' E  |
| Eastern European        | EE-LEV        | White Sea, Levin Navolok, Russia      | 66° 17' N, 33° 26' E  |
| Eastern European        | EE-PYO        | Pyöreälampi, Kuusamo, Finland         | 66° 16' N, 29° 26' E  |
| Eastern European        | EE-ONE        | Lake Onega, Karelia, Russia           | 61° 35' N, 34° 38' E  |
| Eastern European        | EE-SAI        | Lake Saimaa, Taipalsaari, Finland     | 61° 29' N, 27° 29' E  |
| Eastern European        | EE-HEL        | Baltic Sea, Helsinki, Finland         | 60° 12' N, 25° 11' E  |
| Western European        | WE-UGG        | Uggdalsvatnet, Norway                 | 63° 57' N, 10° 25' E  |
| Western European        | WE-ENG        | Engervann, Bærum, Norway              | 59° 54' N, 10° 32' E  |
| Western European        | WE-GUD        | Guden, Silkeborg, Denmark             | 56° 11' N, 9° 38' E   |
| Western European        | WE-HAR        | Harelaw dam, Scotland, United Kingdom | 55° 45' N, 4° 25' W   |
| Western European        | WE-NOR        | North Sea, Emmerlev Klev, Denmark     | 54° 59' N, 8° 40' E   |
| Western European        | WE-BRU        | Brugse polders, Maldegem, Belgium     | 51° 10' N, 3° 28' E   |
| Western European        | WE-MON        | Montagny-lès-Seurre, France           | 47° 01' N, 5° 15' E   |
| <i>P. laevis</i>        | PL-LAR        | Lary River, France                    | 45° 14' N, 0° 13' W   |

**Supplementary Table 2 | Genetic variation at 46 autosomal loci, male-specific alleles at six *G. aculeatus* Chr12 loci and cytochrome *b* haplotypes in 29 *Pungitius* populations.**

| Lineage                       | Population ID       | STR             |                     |                      |                                    |                                                                              | Cytochrome <i>b</i> |                                                |
|-------------------------------|---------------------|-----------------|---------------------|----------------------|------------------------------------|------------------------------------------------------------------------------|---------------------|------------------------------------------------|
|                               |                     | Sample <i>n</i> | Autosomal (46 loci) |                      | <i>G. aculeatus</i> Chr12 (6 loci) |                                                                              | Sample <i>n</i>     | Haplotype ID ( <i>n</i> )                      |
|                               |                     |                 | <i>P</i>            | <i>H<sub>E</sub></i> | <i>P</i>                           | Locus with male-specific allele (bp)                                         |                     |                                                |
| <i>P. tymensis</i>            | PT-MOT              | 36              | 35                  | 0.345                | 3                                  | -                                                                            | 3                   | Pun132 (3)                                     |
| <i>P. tymensis</i>            | PT-OBO              | 36              | 23                  | 0.223                | 3                                  | -                                                                            | 3                   | Pun133 (3)                                     |
| Japanese Omono                | JO-OMO              | 49              | 31                  | 0.301                | 2                                  | -                                                                            | 5                   | Pun110 (5)                                     |
| Japanese freshwater           | JF-SHI              | 48              | 39                  | 0.385                | 4                                  | -                                                                            | 5                   | J2 (5)                                         |
| Japanese freshwater           | JF-SOM              | 18              | 43                  | 0.518                | 6                                  | -                                                                            | 8                   | J1 (3), J2 (1), J4 (1), J5 (2), Pun100 (1)     |
| Japanese freshwater           | JF-OBO              | 48              | 42                  | 0.521                | 5                                  | -                                                                            | 6                   | J1 (1), J2 (1), J3 (1), J4 (1), J5 (2)         |
| Japanese freshwater           | JF-KIE              | 10              | 40                  | 0.483                | 4                                  | -                                                                            | 4                   | Pun135 (4)                                     |
| Japanese freshwater           | JF-YON              | 48              | 35                  | 0.273                | 4                                  | -                                                                            | 5                   | Pun101 (2), Pun102 (2), Pun103 (1)             |
| Japanese freshwater           | JF-TAI              | 48              | 42                  | 0.516                | 4                                  | -                                                                            | 5                   | Pun104 (3), Pun105 (1), Pun106 (1)             |
| Japanese brackish-water       | JB-BLS              | 11              | 44                  | 0.706                | 6                                  | Ppsm11 (189–197), Umf5 (179), Ppsm6 (232), Ppsm3 (182–186), Stn19 (180)      | 5                   | Pun136 (3), Pun137 (1), Pun138 (1)             |
| Japanese brackish-water       | JB-HAM              | 48              | 44                  | 0.629                | 6                                  | Ppsm11 (195), Umf5 (179), Ppsm6 (232), Ppsm5 (229), Stn19 (174)              | 6                   | J5 (1), Pun107 (3), Pun108 (1), Pun109 (1)     |
| Japanese brackish-water       | JB-SOM              | 20              | 44                  | 0.630                | 6                                  | Ppsm11 (195), Umf5 (179), Ppsm6 (232), Ppsm5 (229), Ppsm3 (194), Stn19 (174) | 6                   | J5 (2), Pun107 (4)                             |
| Japanese brackish-water       | JB-WAT              | -               | -                   | -                    | -                                  | -                                                                            | 8                   | Pun107 (5), Pun147 (2), Pun148 (1)             |
| Eastern North American        | EA-BAF              | 23              | 20                  | 0.140                | 6                                  | Ppsm11 (189), Umf5 (179), Ppsm6 (232), Ppsm5 (229), Ppsm3 (182), Stn19 (180) | 10                  | Pun111 (9), Pun112 (1)                         |
| Central North American        | CA-FLO              | 36              | 36                  | 0.199                | 5                                  | Ppsm11 (193), Umf5 (179), Ppsm6 (232), Ppsm5 (217), Ppsm3 (178–209)          | 5                   | Pun139 (2), Pun140 (1), Pun141(1), Pun142 (1)  |
| Eastern European              | EE-L1               | 40              | 33                  | 0.299                | 5                                  | Ppsm11 (197), Ppsm6 (232), Ppsm5 (220), Ppsm3 (180), Stn19 (176)             | 3                   | E7 (2), E8 (1)                                 |
| Eastern European              | EE-LEV              | 40              | 43                  | 0.532                | 6                                  | Ppsm11 (197), Ppsm6 (232), Ppsm5 (229), Ppsm3 (184), Stn19 (176)             | 3                   | E3 (1), E11 (1), E12 (1)                       |
| Eastern European              | EE-PYO              | -               | -                   | -                    | -                                  | -                                                                            | 4                   | E3 (4)                                         |
| Eastern European              | EE-ONE              | 8               | 44                  | 0.522                | 5                                  | Ppsm11 (197), Ppsm6 (232), Ppsm5 (220), Ppsm3 (188), Stn19 (176)             | 3                   | E3 (2), E20 (1)                                |
| Eastern European              | EE-SAI              | 40              | 45                  | 0.518                | 5                                  | Ppsm11 (197), Ppsm6 (232), Ppsm3 (180), Stn19 (176–180)                      | 4                   | E3 (2), E21 (1), E22 (1)                       |
| Eastern European              | EE-HEL              | 40              | 45                  | 0.560                | 5                                  | Ppsm11 (197), Ppsm6 (232), Ppsm5 (229), Ppsm3 (168–172), Stn19 (176)         | 4                   | E3 (4)                                         |
| Western European              | WE-UGG              | -               | -                   | -                    | -                                  | -                                                                            | 8                   | Pun124 (8)                                     |
| Western European              | WE-ENG              | 41              | 46                  | 0.577                | 5                                  | -                                                                            | 6                   | E28 (3), E29 (1), E30 (2)                      |
| Western European              | WE-GUD              | 32              | 39                  | 0.390                | 5                                  | Ppsm11 (197), Ppsm6 (232), Ppsm5 (229), Ppsm3 (188), Stn19 (176)             | 3                   | E31 (2), E33 (1)                               |
| Western European              | WE-HAR              | 10              | 38                  | 0.422                | 3                                  | -                                                                            | 3                   | E34 (3)                                        |
| Western European              | WE-NOR              | -               | -                   | -                    | -                                  | -                                                                            | 6                   | Pun143 (4), Pun149 (2)                         |
| Western European              | WE-BRU              | 24              | 44                  | 0.489                | 5                                  | -                                                                            | 5                   | Pun143 (1), Pun144 (2), Pun145 (1), Pun146 (1) |
| Western European              | WE-MON              | 8               | 40                  | 0.414                | 5                                  | -                                                                            | 7                   | E37 (3), E38 (4)                               |
| <i>P. laevis</i>              | PL-LAR              | 10              | 32                  | 0.410                | 4                                  | -                                                                            | 6                   | Pun120 (2), Pun122 (3), Pun123 (1)             |
| <i>Gasterosteus aculeatus</i> | <i>G. aculeatus</i> | 24              | 44                  | 0.644                | 6                                  | -                                                                            | 1                   | Gac1 (1)                                       |

*P*, the number of polymorphic loci; *H<sub>E</sub>*, mean expected heterozygosity.

**Supplementary Table 3 | Average genetic distances ( $D_A$ ) between PT, JO, JF and WE lineages and X and Y haplotypes of XY lineages based on 35 *G. aculeatus* Chr12 loci.**

|             | PT lineage              | JO lineage              | JF lineage               | WE lineage               | X haplotype              | Y haplotype              |
|-------------|-------------------------|-------------------------|--------------------------|--------------------------|--------------------------|--------------------------|
| PT lineage  | -                       | -                       | -                        | -                        | -                        | -                        |
| JO lineage  | 0.794 (1)               | -                       | -                        | -                        | -                        | -                        |
| JF lineage  | 0.849 [0.750–0.948] (3) | 0.870 [0.825–0.915] (3) | 0.489 [0.409–0.568] (3)  | -                        | -                        | -                        |
| WE lineage  | 0.926 [0.878–0.974] (3) | 0.906 [0.886–0.926] (3) | 0.878 [0.860–0.896] (9)  | 0.312 [-0.025–0.650] (3) | -                        | -                        |
| X haplotype | 0.909 [0.864–0.954] (5) | 0.919 [0.884–0.955] (5) | 0.898 [0.882–0.914] (15) | 0.593 [0.525–0.660] (15) | 0.612 [0.454–0.771] (10) | -                        |
| Y haplotype | 0.899 [0.868–0.929] (5) | 0.930 [0.895–0.965] (5) | 0.621 [0.588–0.654] (15) | 0.918 [0.902–0.934] (15) | 0.918 [0.901–0.934] (25) | 0.564 [0.391–0.736] (10) |

The number of population pairs is shown in parentheses. Numbers in brackets indicate 95% confidence intervals.

**Supplementary Table 4 | Egg number, fertilization rate, hatching rate and larval survival in five *Pungitius* lineages and their crosses.**

| Cross              |        | Offspring                | Cross <i>n</i> | <i>n</i> of families used <sup>†</sup> |      | Egg <i>n</i><br>(mean [range]) | Fertilization (%)<br>(mean ± s.e.m.) | Hatching (%)<br>(mean ± s.e.m.) | Larval survival (%)<br>(mean ± s.e.m.) |
|--------------------|--------|--------------------------|----------------|----------------------------------------|------|--------------------------------|--------------------------------------|---------------------------------|----------------------------------------|
| Female             | Male   |                          |                | Female                                 | Male |                                |                                      |                                 |                                        |
| Population         |        |                          |                |                                        |      |                                |                                      |                                 |                                        |
| JO-OMO             | JO-OMO | JO-OMO                   | 3              | 3                                      | 3    | 61.3 [44–75] (3)               | 100.0 ± 0.0 (3)                      | 62.9 ± 15.6 (3)                 | 92.9 ± 7.1 (3)                         |
| JF-YON             | JF-YON | JF-YON                   | 15             | 9                                      | 7    | 37.8 [15–87] (15)              | 98.3 ± 1.2 (15)                      | 88.2 ± 2.2 (15)                 | 98.5 ± 0.5 (15)                        |
| JB-HAM             | JB-HAM | JB-HAM                   | 15             | 8                                      | 11   | 38.1 [16–75] (15)              | 99.3 ± 0.5 (15)                      | 92.3 ± 2.1 (15)                 | 99.5 ± 0.4 (15)                        |
| EE-HEL             | EE-HEL | EE-HEL                   | 15             | 15                                     | 11   | 50.3 [17–99] (15)              | 98.6 ± 1.3 (15)                      | 88.3 ± 2.9 (15)                 | 97.3 ± 1.1 (15)                        |
| WE-BRU             | WE-BRU | WE-BRU                   | 15             | 10                                     | 10   | 65.1 [25–126] (15)             | 99.5 ± 0.3 (15)                      | 92.8 ± 1.4 (15)                 | 98.6 ± 0.6 (15)                        |
| Interlineage cross |        |                          |                |                                        |      |                                |                                      |                                 |                                        |
| JO-OMO             | JF-YON | F <sub>1</sub> (JO × JF) | 3              | 3                                      | 3    | 44.0 [40–52] (3)               | 100.0 ± 0.0 (3)                      | 78.4 ± 9.6 (3)                  | 98.4 ± 1.6 (3)                         |
| JF-YON             | JO-OMO | F <sub>1</sub> (JF × JO) | 6              | 5                                      | 6    | 67.8 [33–86] (6)               | 98.9 ± 0.6 (6)                       | 75.9 ± 5.4 (6)                  | 96.2 ± 1.9 (6)                         |
| JO-OMO             | JB-HAM | F <sub>1</sub> (JO × JB) | 4              | 4                                      | 4    | 47.5 [32–59] (4)               | 90.4 ± 6.0 (4)                       | 87.3 ± 4.5 (4)                  | 99.5 ± 0.5 (4)                         |
| JB-HAM             | JO-OMO | F <sub>1</sub> (JB × JO) | 6              | 5                                      | 6    | 58.0 [45–77] (6)               | 99.7 ± 0.3 (6)                       | 89.2 ± 3.8 (6)                  | 97.8 ± 0.8 (6)                         |
| JO-OMO             | EE-HEL | F <sub>1</sub> (JO × EE) | 4              | 4                                      | 4    | 40.3 [35–50] (4)               | 99.0 ± 1.0 (4)                       | 77.1 ± 11.3 (4)                 | 86.1 ± 7.3 (4)                         |
| EE-HEL             | JO-OMO | F <sub>1</sub> (EE × JO) | 6              | 6                                      | 6    | 70.0 [40–158] (6)              | 100.0 ± 0.0 (6)                      | 87.6 ± 2.2 (6)                  | 97.8 ± 1.0 (6)                         |
| JO-OMO             | WE-BRU | F <sub>1</sub> (JO × WE) | 3              | 3                                      | 3    | 53.3 [40–65] (3)               | 100.0 ± 0.0 (3)                      | 66.8 ± 21.9 (3)                 | 94.6 ± 4.0 (3)                         |
| WE-BRU             | JO-OMO | F <sub>1</sub> (WE × JO) | 6              | 6                                      | 6    | 61.8 [50–77] (6)               | 92.7 ± 6.4 (6)                       | 88.1 ± 4.4 (6)                  | 98.6 ± 1.2 (6)                         |
| JF-YON             | JB-HAM | F <sub>1</sub> (JF × JB) | 3              | 3                                      | 3    | 50.3 [42–61] (3)               | 100.0 ± 0.0 (3)                      | 84.6 ± 3.8 (3)                  | 98.2 ± 0.9 (3)                         |
| JB-HAM             | JF-YON | F <sub>1</sub> (JB × JF) | 6              | 4                                      | 3    | 43.2 [32–61] (6)               | 99.1 ± 0.9 (6)                       | 88.8 ± 4.6 (6)                  | 99.6 ± 0.4 (6)                         |
| JF-YON             | EE-HEL | F <sub>1</sub> (JF × EE) | 4              | 3                                      | 4    | 45.5 [26–65] (4)               | 99.0 ± 1.1 (4)                       | 92.0 ± 2.7 (4)                  | 99.6 ± 0.4 (4)                         |
| EE-HEL             | JF-YON | F <sub>1</sub> (EE × JF) | 4              | 4                                      | 3    | 55.0 [34–70] (4)               | 95.6 ± 4.4 (4)                       | 95.7 ± 1.6 (4)                  | 98.7 ± 0.4 (4)                         |
| JF-YON             | WE-BRU | F <sub>1</sub> (JF × WE) | 3              | 3                                      | 3    | 38.3 [28–44] (3)               | 98.4 ± 1.6 (3)                       | 90.3 ± 4.4 (3)                  | 100.0 ± 0.0 (3)                        |
| WE-BRU             | JF-YON | F <sub>1</sub> (WE × JF) | 5              | 4                                      | 3    | 55.8 [50–71] (5)               | 100.0 ± 0.0 (5)                      | 93.5 ± 2.7 (5)                  | 96.5 ± 3.1 (5)                         |
| JB-HAM             | EE-HEL | F <sub>1</sub> (JB × EE) | 6              | 5                                      | 4    | 47.8 [34–67] (6)               | 100.0 ± 0.0 (6)                      | 89.9 ± 3.4 (6)                  | 99.0 ± 1.0 (6)                         |
| EE-HEL             | JB-HAM | F <sub>1</sub> (EE × JB) | 5              | 5                                      | 5    | 56.2 [39–78] (5)               | 100.0 ± 0.0 (5)                      | 95.3 ± 1.6 (5)                  | 97.9 ± 1.1 (5)                         |
| JB-HAM             | WE-BRU | F <sub>1</sub> (JB × WE) | 7              | 5                                      | 5    | 40.4 [19–49] (7)               | 99.6 ± 0.4 (7)                       | 89.9 ± 3.6 (7)                  | 98.6 ± 1.0 (7)                         |
| WE-BRU             | JB-HAM | F <sub>1</sub> (WE × JB) | 7              | 5                                      | 5    | 54.9 [37–73] (7)               | 100.0 ± 0.0 (7)                      | 92.0 ± 2.5 (7)                  | 98.6 ± 0.5 (7)                         |
| EE-HEL             | WE-BRU | F <sub>1</sub> (EE × WE) | 10             | 10                                     | 10   | 59.1 [20–98] (10)              | 99.8 ± 0.2 (10)                      | 88.2 ± 4.5 (10)                 | 97.6 ± 1.1 (10)                        |
| WE-BRU             | EE-HEL | F <sub>1</sub> (WE × EE) | 10             | 10                                     | 10   | 89.4 [31–132] (10)             | 99.6 ± 0.3 (10)                      | 94.4 ± 2.3 (10)                 | 98.5 ± 0.8 (10)                        |

The number of families is shown in parentheses. <sup>†</sup>Wild-caught individuals are counted as different families.

Hatching and larval survival rates are represented based on fertilized and hatched eggs, respectively.

**Supplementary Table 5 | Survival and sex ratio in five *Pungitius* lineages and their hybrids.**

| Cross                              |        | Offspring                | Cross <i>n</i> | <i>n</i> of families used <sup>†</sup> |      | Egg <i>n</i> | Fertilized egg <i>n</i> | Hatched egg <i>n</i><br>(/fertilized egg) | Larval survival <i>n</i><br>(/fertilized egg) | Adult <i>n</i><br>(/fertilized egg) | Adult female <i>n</i><br>(/adult) | Adult male <i>n</i><br>(/adult) |
|------------------------------------|--------|--------------------------|----------------|----------------------------------------|------|--------------|-------------------------|-------------------------------------------|-----------------------------------------------|-------------------------------------|-----------------------------------|---------------------------------|
| Female                             | Male   |                          |                | Female                                 | Male |              |                         |                                           |                                               |                                     |                                   |                                 |
| Population                         |        |                          |                |                                        |      |              |                         |                                           |                                               |                                     |                                   |                                 |
| JO-OMO                             | JO-OMO | JO-OMO                   | 2              | 2                                      | 2    | 140          | 140                     | 110 (78.6%)                               | 110 (78.6%)                                   | 57 (40.7%)                          | 30 (52.6%)                        | 27 (47.4%)                      |
| JF-YON                             | JF-YON | JF-YON                   | 12             | 7                                      | 7    | 466          | 446                     | 385 (86.3%)                               | 379 (85.0%)                                   | 243 (54.5%)                         | 119 (49.0%)                       | 124 (51.0%)                     |
| JB-HAM                             | JB-HAM | JB-HAM                   | 15             | 8                                      | 11   | 572          | 567                     | 523 (92.2%)                               | 520 (91.7%)                                   | 391 (69.0%)                         | 190 (48.6%)                       | 201 (51.4%)                     |
| EE-HEL                             | EE-HEL | EE-HEL                   | 12             | 12                                     | 10   | 517          | 508                     | 436 (85.8%)                               | 424 (83.5%)                                   | 244 (48.0%)                         | 132 (54.1%)                       | 113 (46.3%)                     |
| WE-BRU                             | WE-BRU | WE-BRU                   | 12             | 9                                      | 9    | 815          | 812                     | 761 (93.7%)                               | 748 (92.1%)                                   | 351 (43.2%)                         | 176 (50.1%)                       | 175 (49.9%)                     |
| Interlineage F <sub>1</sub> hybrid |        |                          |                |                                        |      |              |                         |                                           |                                               |                                     |                                   |                                 |
| JO-OMO                             | JF-YON | F <sub>1</sub> (JO × JF) | 3              | 3                                      | 3    | 132          | 132                     | 104 (78.8%)                               | 102 (77.3%)                                   | 84 (63.6%)                          | 35 (41.7%)                        | 49 (58.3%)                      |
| JF-YON                             | JO-OMO | F <sub>1</sub> (JF × JO) | 6              | 5                                      | 6    | 407          | 402                     | 305 (75.9%)                               | 296 (73.6%)                                   | 180 (44.8%)                         | 77 (42.8%)                        | 103 (57.2%)                     |
| JO-OMO                             | JB-HAM | F <sub>1</sub> (JO × JB) | 4              | 4                                      | 4    | 190          | 172                     | 153 (89.0%)                               | 152 (88.4%)                                   | 111 (64.5%)                         | 49 (44.1%)                        | 62 (55.9%)                      |
| JB-HAM                             | JO-OMO | F <sub>1</sub> (JB × JO) | 6              | 5                                      | 6    | 348          | 347                     | 310 (89.3%)                               | 304 (87.6%)                                   | 155 (44.7%)                         | 36 (23.2%)***                     | 119 (76.8%)***                  |
| JO-OMO                             | EE-HEL | F <sub>1</sub> (JO × EE) | 3              | 3                                      | 3    | 124          | 122                     | 85 (69.7%)                                | 71 (58.2%)                                    | 49 (40.2%)                          | 23 (46.9%)                        | 26 (53.1%)                      |
| EE-HEL                             | JO-OMO | F <sub>1</sub> (EE × JO) | 4              | 4                                      | 4    | 328          | 328                     | 291 (88.7%)                               | 287 (87.5%)                                   | 81 (24.7%)                          | 29 (35.8%)                        | 52 (64.2%)                      |
| JO-OMO                             | WE-BRU | F <sub>1</sub> (JO × WE) | 3              | 3                                      | 3    | 160          | 160                     | 99 (61.9%)                                | 96 (60.0%)                                    | 84 (52.5%)                          | 33 (39.3%)                        | 51 (60.7%)                      |
| WE-BRU                             | JO-OMO | F <sub>1</sub> (WE × JO) | 5              | 5                                      | 5    | 308          | 275                     | 245 (89.1%)                               | 244 (88.7%)                                   | 102 (37.1%)                         | 17 (16.7%)***                     | 85 (83.3%)***                   |
| JF-YON                             | JB-HAM | F <sub>1</sub> (JF × JB) | 3              | 3                                      | 3    | 151          | 151                     | 128 (84.8%)                               | 126 (83.4%)                                   | 86 (57.0%)                          | 41 (47.7%)                        | 45 (52.3%)                      |
| JB-HAM                             | JF-YON | F <sub>1</sub> (JB × JF) | 6              | 4                                      | 3    | 259          | 257                     | 231 (89.9%)                               | 230 (89.5%)                                   | 179 (69.6%)                         | 16 (8.9%)***                      | 163 (91.1%)***                  |
| JF-YON                             | EE-HEL | F <sub>1</sub> (JF × EE) | 4              | 3                                      | 4    | 182          | 180                     | 167 (92.8%)                               | 166 (92.2%)                                   | 91 (50.6%)                          | 53 (58.2%)                        | 38 (41.8%)                      |
| EE-HEL                             | JF-YON | F <sub>1</sub> (EE × JF) | 4              | 4                                      | 3    | 220          | 214                     | 205 (95.8%)                               | 202 (94.4%)                                   | 100 (46.7%)                         | 17 (17.0%)***                     | 83 (83.0%)***                   |
| JF-YON                             | WE-BRU | F <sub>1</sub> (JF × WE) | 3              | 3                                      | 3    | 115          | 113                     | 101 (89.4%)                               | 101 (89.4%)                                   | 59 (52.2%)                          | 24 (40.7%)                        | 35 (59.3%)                      |
| WE-BRU                             | JF-YON | F <sub>1</sub> (WE × JF) | 5              | 4                                      | 3    | 279          | 279                     | 261 (93.5%)                               | 253 (90.7%)                                   | 126 (45.2%)                         | 0 (0.0%)***                       | 126 (100.0%)***                 |
| JB-HAM                             | EE-HEL | F <sub>1</sub> (JB × EE) | 6              | 5                                      | 4    | 287          | 287                     | 258 (89.9%)                               | 256 (89.2%)                                   | 178 (62.0%)                         | 88 (49.4%)                        | 90 (50.6%)                      |
| EE-HEL                             | JB-HAM | F <sub>1</sub> (EE × JB) | 5              | 5                                      | 5    | 281          | 281                     | 269 (95.7%)                               | 264 (94.0%)                                   | 129 (45.9%)                         | 61 (47.3%)                        | 68 (52.7%)                      |
| JB-HAM                             | WE-BRU | F <sub>1</sub> (JB × WE) | 7              | 5                                      | 5    | 283          | 282                     | 259 (91.8%)                               | 255 (90.4%)                                   | 166 (58.9%)                         | 77 (46.4%)                        | 89 (53.6%)                      |
| WE-BRU                             | JB-HAM | F <sub>1</sub> (WE × JB) | 7              | 5                                      | 5    | 384          | 384                     | 357 (93.0%)                               | 352 (91.7%)                                   | 238 (62.0%)                         | 117 (49.2%)                       | 121 (50.8%)                     |
| EE-HEL                             | WE-BRU | F <sub>1</sub> (EE × WE) | 3              | 3                                      | 3    | 125          | 125                     | 92 (73.6%)                                | 89 (71.2%)                                    | 64 (51.2%)                          | 30 (46.9%)                        | 34 (53.1%)                      |
| WE-BRU                             | EE-HEL | F <sub>1</sub> (WE × EE) | 4              | 4                                      | 4    | 426          | 426                     | 376 (88.3%)                               | 373 (87.6%)                                   | 134 (31.5%)                         | 67 (50.0%)                        | 67 (50.0%)                      |

Significantly different from 1:1 at  $P < 0.001$ \*\*\*. †Wild-caught individuals are counted as different families.



**Supplementary Table 6 | Egg number, fertilization rate, hatching rate and larval survival in backcrosses between interlineage F<sub>1</sub> hybrids and parental populations.**

| Parent                   |                          | Offspring                        | Cross <i>n</i> | <i>n</i> of families used† |      | Egg <i>n</i><br>(mean [range]) | Fertilization (%)<br>(mean ± s.e.m.) | Hatching (%)<br>(mean ± s.e.m.) | Larval survival (%)<br>(mean ± s.e.m.) |
|--------------------------|--------------------------|----------------------------------|----------------|----------------------------|------|--------------------------------|--------------------------------------|---------------------------------|----------------------------------------|
| Female                   | Male                     |                                  |                | Female                     | Male |                                |                                      |                                 |                                        |
| F <sub>1</sub> (JO × JF) | JO-OMO                   | BC(F <sub>1</sub> (JO×JF) × JO)  | 4              | 3                          | 3    | 46.8 [28–83] (4)               | 93.3 ± 5.9 (4)                       | 77.5 ± 14.1 (4)                 | 100.0 ± 0.0 (4)                        |
| F <sub>1</sub> (JO × JF) | JF-YON                   | BC(F <sub>1</sub> (JO×JF) × JF)  | 13             | 3                          | 5    | 51.0 [12–81] (13)              | 84.6 ± 5.5 (13)                      | 84.4 ± 4.6 (13)                 | 93.4 ± 3.6 (13)                        |
| JO-OMO                   | F <sub>1</sub> (JO × JF) | BC(JO × F <sub>1</sub> (JO×JF))  | 3              | 3                          | 3    | 26.7 [18–34] (3)               | 85.5 ± 2.9 (3)                       | 73.6 ± 11.1 (3)                 | 100.0 ± 0.0 (3)                        |
| JF-YON                   | F <sub>1</sub> (JO × JF) | BC(JF × F <sub>1</sub> (JO×JF))  | 8              | 4                          | 3    | 45.0 [32–66] (8)               | 99.1 ± 0.4 (8)                       | 77.2 ± 5.5 (8)                  | 97.2 ± 1.9 (8)                         |
| F <sub>1</sub> (JF × JO) | JO-OMO                   | BC(F <sub>1</sub> (JF×JO) × JO)  | 7              | 4                          | 4    | 46.7 [27–99] (7)               | 88.6 ± 6.1 (7)                       | 75.1 ± 2.9 (7)                  | 99.2 ± 0.5 (7)                         |
| F <sub>1</sub> (JF × JO) | JF-YON                   | BC(F <sub>1</sub> (JF×JO) × JF)  | 14             | 4                          | 7    | 50.7 [27–71] (14)              | 95.3 ± 2.6 (14)                      | 82.6 ± 2.8 (14)                 | 94.3 ± 2.4 (14)                        |
| JO-OMO                   | F <sub>1</sub> (JF × JO) | BC(JO × F <sub>1</sub> (JF×JO))  | 2              | 2                          | 2    | 25.5 [18–33] (2)               | 94.0 ± 6.1 (2)                       | 93.8 ± 0.7 (2)                  | 98.2 ± 1.9 (2)                         |
| JF-YON                   | F <sub>1</sub> (JF × JO) | BC(JF × F <sub>1</sub> (JF×JO))  | 14             | 4                          | 5    | 47.9 [36–110] (14)             | 99.5 ± 0.3 (14)                      | 80.9 ± 4.2 (14)                 | 97.0 ± 1.9 (14)                        |
| F <sub>1</sub> (JO × JB) | JO-OMO                   | BC(F <sub>1</sub> (JO×JB) × JO)  | 2              | 2                          | 2    | 28.0 [25–31] (2)               | 98.4 ± 1.6 (2)                       | 90.0 ± 10.0 (2)                 | 98.4 ± 1.7 (2)                         |
| F <sub>1</sub> (JO × JB) | JB-HAM                   | BC(F <sub>1</sub> (JO×JB) × JB)  | 4              | 3                          | 4    | 50.8 [31–83] (4)               | 100.0 ± 0.0 (4)                      | 81.4 ± 3.1 (4)                  | 90.0 ± 8.7 (4)                         |
| JO-OMO                   | F <sub>1</sub> (JO × JB) | BC(JO × F <sub>1</sub> (JO×JB))  | 2              | 2                          | 1    | 19.0 [17–21] (2)               | 0.0 ± 0.0 (2)                        | (0)                             | (0)                                    |
| JB-HAM                   | F <sub>1</sub> (JO × JB) | BC(JB × F <sub>1</sub> (JO×JB))  | 16             | 6                          | 4    | 45.0 [15–83] (16)              | 45.6 ± 12.0 (16)                     | 46.1 ± 7.7 (8)                  | 65.7 ± 7.4 (8)                         |
| F <sub>1</sub> (JB × JO) | JO-OMO                   | BC(F <sub>1</sub> (JB×JO) × JO)  | 2              | 2                          | 2    | 29.5 [24–35] (2)               | 98.6 ± 1.5 (2)                       | 76.4 ± 2.9 (2)                  | 100.0 ± 0.0 (2)                        |
| F <sub>1</sub> (JB × JO) | JB-HAM                   | BC(F <sub>1</sub> (JB×JO) × JB)  | 5              | 3                          | 3    | 36.4 [22–79] (5)               | 100.0 ± 0.0 (5)                      | 88.8 ± 3.2 (5)                  | 95.4 ± 2.3 (5)                         |
| JO-OMO                   | F <sub>1</sub> (JB × JO) | BC(JO × F <sub>1</sub> (JB×JO))  | 6              | 6                          | 5    | 25.2 [19–34] (6)               | 0.0 ± 0.0 (6)                        | (0)                             | (0)                                    |
| JB-HAM                   | F <sub>1</sub> (JB × JO) | BC(JB × F <sub>1</sub> (JB×JO))  | 15             | 6                          | 6    | 44.0 [15–112] (15)             | 4.3 ± 4.3 (15)                       | 10.7 (1)                        | 100 (1)                                |
| F <sub>1</sub> (JO × EE) | JO-OMO                   | BC(F <sub>1</sub> (JO×EE) × JO)  | 1              | 1                          | 1    | 35.0 [35–35] (1)               | 100.0 (1)                            | 31.4 (1)                        | 90.9 (1)                               |
| F <sub>1</sub> (JO × EE) | EE-HEL                   | BC(F <sub>1</sub> (JO×EE) × EE)  | 4              | 2                          | 4    | 77.3 [27–132] (4)              | 95.6 ± 3.0 (4)                       | 55.2 ± 12.1 (4)                 | 93.5 ± 1.5 (4)                         |
| JO-OMO                   | F <sub>1</sub> (JO × EE) | BC(JO × F <sub>1</sub> (JO×EE) ) | 3              | 3                          | 2    | 22.7 [10–35] (3)               | 0.0 ± 0.0 (3)                        | (0)                             | (0)                                    |
| EE-HEL                   | F <sub>1</sub> (JO × EE) | BC(EE × F <sub>1</sub> (JO×EE) ) | 9              | 5                          | 4    | 44.8 [27–69] (9)               | 29.8 ± 15.2 (9)                      | 50.5 ± 11.6 (3)                 | 94.4 ± 5.6 (3)                         |
| F <sub>1</sub> (EE × JO) | JO-OMO                   | BC(F <sub>1</sub> (EE×JO) × JO)  | 3              | 3                          | 3    | 41.3 [20–58] (3)               | 94.6 ± 0.8 (3)                       | 52.0 ± 9.5 (3)                  | 93.8 ± 2.0 (3)                         |
| F <sub>1</sub> (EE × JO) | EE-HEL                   | BC(F <sub>1</sub> (EE×JO) × EE)  | 7              | 3                          | 6    | 33.3 [12–49] (7)               | 94.2 ± 2.4 (7)                       | 63.0 ± 9.0 (7)                  | 97.7 ± 1.3 (7)                         |
| JO-OMO                   | F <sub>1</sub> (EE × JO) | BC(JO × F <sub>1</sub> (EE×JO))  | 4              | 4                          | 3    | 18.0 [13–24] (4)               | 0.0 ± 0.0 (4)                        | (0)                             | (0)                                    |
| EE-HEL                   | F <sub>1</sub> (EE × JO) | BC(EE × F <sub>1</sub> (EE×JO))  | 15             | 4                          | 7    | 43.5 [21–92] (15)              | 0.0 ± 0.0 (15)                       | (0)                             | (0)                                    |
| F <sub>1</sub> (JO × WE) | JO-OMO                   | BC(F <sub>1</sub> (JO×WE) × JO)  | 3              | 1                          | 2    | 24.7 [18–32] (3)               | 92.6 ± 7.4 (3)                       | 61.8 ± 8.9 (3)                  | 96.3 ± 3.7 (3)                         |
| F <sub>1</sub> (JO × WE) | WE-BRU                   | BC(F <sub>1</sub> (JO×WE) × WE)  | 8              | 2                          | 5    | 45.9 [18–72] (8)               | 97.9 ± 1.7 (8)                       | 76.9 ± 6.3 (8)                  | 95.6 ± 1.6 (8)                         |
| JO-OMO                   | F <sub>1</sub> (JO × WE) | BC(JO × F <sub>1</sub> (JO×WE))  | 5              | 5                          | 2    | 29.6 [12–69] (5)               | 26.0 ± 17.6 (5)                      | 37.2 ± 2.8 (2)                  | 83.4 ± 16.7 (2)                        |
| WE-BRU                   | F <sub>1</sub> (JO × WE) | BC(WE × F <sub>1</sub> (JO×WE))  | 13             | 6                          | 3    | 62.0 [33–101] (13)             | 58.9 ± 12.1 (13)                     | 66.7 ± 6.3 (9)                  | 78.8 ± 7.1 (9)                         |
| F <sub>1</sub> (WE × JO) | JO-OMO                   | BC(F <sub>1</sub> (WE×JO) × JO)  | 7              | 4                          | 5    | 35.3 [21–57] (7)               | 93.5 ± 4.8 (7)                       | 70.4 ± 8.9 (7)                  | 93.9 ± 1.8 (7)                         |
| F <sub>1</sub> (WE × JO) | WE-BRU                   | BC(F <sub>1</sub> (WE×JO) × WE)  | 11             | 5                          | 6    | 52.7 [18–100] (11)             | 97.0 ± 2.2 (11)                      | 78.9 ± 4.9 (11)                 | 93.8 ± 2.2 (11)                        |
| JO-OMO                   | F <sub>1</sub> (WE × JO) | BC(JO × F <sub>1</sub> (WE×JO))  | 5              | 5                          | 4    | 28.8 [13–59] (5)               | 0.0 ± 0.0 (5)                        | (0)                             | (0)                                    |
| WE-BRU                   | F <sub>1</sub> (WE × JO) | BC(WE × F <sub>1</sub> (WE×JO))  | 16             | 4                          | 5    | 61.0 [28–113] (16)             | 42.6 ± 10.7 (16)                     | 67.1 ± 6.1 (9)                  | 77.6 ± 7.3 (9)                         |
| F <sub>1</sub> (JF × JB) | JF-YON                   | BC(F <sub>1</sub> (JF×JB) × JF)  | 8              | 3                          | 6    | 42.3 [33–59] (8)               | 99.5 ± 0.4 (8)                       | 87.9 ± 4.7 (8)                  | 89.3 ± 5.5 (8)                         |
| F <sub>1</sub> (JF × JB) | JB-HAM                   | BC(F <sub>1</sub> (JF×JB) × JB)  | 7              | 3                          | 5    | 42.0 [27–55] (7)               | 100.0 ± 0.0 (7)                      | 86.5 ± 4.9 (7)                  | 91.4 ± 2.9 (7)                         |
| JF-YON                   | F <sub>1</sub> (JF × JB) | BC(JF × F <sub>1</sub> (JF×JB))  | 6              | 4                          | 3    | 47.0 [19–72] (6)               | 0.0 ± 0.0 (6)**                      | (0)                             | (0)                                    |
| JB-HAM                   | F <sub>1</sub> (JF × JB) | BC(JB × F <sub>1</sub> (JF×JB))  | 6              | 5                          | 3    | 37.5 [23–58] (6)               | 0.0 ± 0.0 (6)**                      | (0)                             | (0)                                    |
| F <sub>1</sub> (JB × JF) | JF-YON                   | BC(F <sub>1</sub> (JB×JF) × JF)  | 2              | 1                          | 2    | 41.5 [41–42] (2)               | 100.0 ± 0.0 (2)                      | 86.8 ± 1.3 (2)                  | 94.5 ± 0.1 (2)                         |
| F <sub>1</sub> (JB × JF) | JB-HAM                   | BC(F <sub>1</sub> (JB×JF) × JB)  | 2              | 1                          | 2    | 41.0 [37–45] (2)               | 100.0 ± 0.0 (2)                      | 91.8 ± 2.8 (2)                  | 96.3 ± 3.8 (2)                         |
| JF-YON                   | F <sub>1</sub> (JB × JF) | BC(JF × F <sub>1</sub> (JB×JF))  | 12             | 5                          | 6    | 47.3 [28–68] (12)              | 0.0 ± 0.0 (12)***                    | (0)                             | (0)                                    |
| JB-HAM                   | F <sub>1</sub> (JB × JF) | BC(JB × F <sub>1</sub> (JB×JF))  | 12             | 7                          | 6    | 42.1 [16–78] (12)              | 0.0 ± 0.0 (12)***                    | (0)                             | (0)                                    |
| F <sub>1</sub> (JF × EE) | JF-YON                   | BC(F <sub>1</sub> (JF×EE) × JF)  | 6              | 3                          | 3    | 51.0 [29–70] (6)               | 99.8 ± 0.2 (6)                       | 83.2 ± 3.7 (6)                  | 94.2 ± 2.0 (6)                         |
| F <sub>1</sub> (JF × EE) | EE-HEL                   | BC(F <sub>1</sub> (JF×EE) × EE)  | 6              | 3                          | 3    | 44.8 [31–60] (6)               | 98.9 ± 0.8 (6)                       | 90.5 ± 4.4 (6)                  | 86.6 ± 5.3 (6)                         |
| JF-YON                   | F <sub>1</sub> (JF × EE) | BC(JF × F <sub>1</sub> (JF×EE))  | 8              | 6                          | 4    | 50.3 [37–83] (8)               | 0.0 ± 0.0 (8)***                     | (0)                             | (0)                                    |
| EE-HEL                   | F <sub>1</sub> (JF × EE) | BC(EE × F <sub>1</sub> (JF×EE))  | 8              | 6                          | 4    | 55.4 [23–89] (8)               | 0.0 ± 0.0 (8)***                     | (0)                             | (0)                                    |

|                          |                          |                                 |    |   |   |                    |                   |                 |                 |
|--------------------------|--------------------------|---------------------------------|----|---|---|--------------------|-------------------|-----------------|-----------------|
| JF-YON                   | F <sub>1</sub> (EE × JF) | BC(JF × F <sub>1</sub> (EE×JF)) | 8  | 6 | 4 | 47.1 [33–87] (8)   | 0.0 ± 0.0 (8)***  | (0)             | (0)             |
| EE-HEL                   | F <sub>1</sub> (EE × JF) | BC(EE × F <sub>1</sub> (EE×JF)) | 8  | 6 | 4 | 50.1 [22–92] (8)   | 0.0 ± 0.0 (8)***  | (0)             | (0)             |
| F <sub>1</sub> (JF × WE) | JF-YON                   | BC(F <sub>1</sub> (JF×WE) × JF) | 7  | 3 | 3 | 57.7 [36–111] (7)  | 98.6 ± 1.3 (7)    | 92.3 ± 2.0 (7)  | 95.9 ± 1.3 (7)  |
| F <sub>1</sub> (JF × WE) | WE-BRU                   | BC(F <sub>1</sub> (JF×WE) × WE) | 7  | 3 | 5 | 54.6 [25–112] (7)  | 94.4 ± 5.1 (7)    | 89.1 ± 5.5 (7)  | 95.0 ± 1.1 (7)  |
| JF-YON                   | F <sub>1</sub> (JF × WE) | BC(JF × F <sub>1</sub> (JF×WE)) | 8  | 4 | 4 | 44.6 [33–54] (8)   | 0.0 ± 0.0 (8)***  | (0)             | (0)             |
| WE-BRU                   | F <sub>1</sub> (JF × WE) | BC(WE × F <sub>1</sub> (JF×WE)) | 8  | 5 | 4 | 71.9 [19–104] (8)  | 0.0 ± 0.0 (8)***  | (0)             | (0)             |
| JF-YON                   | F <sub>1</sub> (WE × JF) | BC(JF × F <sub>1</sub> (WE×JF)) | 11 | 6 | 6 | 51.5 [33–96] (11)  | 0.0 ± 0.0 (11)*** | (0)             | (0)             |
| WE-BRU                   | F <sub>1</sub> (WE × JF) | BC(WE × F <sub>1</sub> (WE×JF)) | 11 | 7 | 6 | 73.6 [18–109] (11) | 0.0 ± 0.0 (11)*** | (0)             | (0)             |
| F <sub>1</sub> (JB × EE) | JB-HAM                   | BC(F <sub>1</sub> (JB×EE) × JB) | 12 | 6 | 7 | 47.8 [23–81] (12)  | 97.7 ± 2.3 (12)   | 89.7 ± 1.8 (12) | 96.1 ± 2.8 (12) |
| F <sub>1</sub> (JB × EE) | EE-HEL                   | BC(F <sub>1</sub> (JB×EE) × EE) | 12 | 6 | 6 | 43.8 [20–88] (12)  | 99.1 ± 0.6 (12)   | 92.6 ± 1.4 (12) | 99.0 ± 0.7 (12) |
| JB-HAM                   | F <sub>1</sub> (JB × EE) | BC(JB × F <sub>1</sub> (JB×EE)) | 10 | 6 | 6 | 57.4 [32–101] (10) | 98.0 ± 1.4 (10)   | 90.3 ± 3.3 (10) | 98.5 ± 0.7 (10) |
| EE-HEL                   | F <sub>1</sub> (JB × EE) | BC(EE × F <sub>1</sub> (JB×EE)) | 10 | 6 | 6 | 63.7 [35–93] (10)  | 99.5 ± 0.5 (10)   | 91.9 ± 2.6 (10) | 98.9 ± 0.5 (10) |
| F <sub>1</sub> (EE × JB) | JB-HAM                   | BC(F <sub>1</sub> (EE×JB) × JB) | 10 | 7 | 7 | 41.4 [29–62] (10)  | 98.6 ± 1.4 (10)   | 92.6 ± 1.5 (10) | 99.3 ± 0.4 (10) |
| F <sub>1</sub> (EE × JB) | EE-HEL                   | BC(F <sub>1</sub> (EE×JB) × EE) | 10 | 6 | 7 | 39.8 [25–66] (10)  | 100.0 ± 0.0 (10)  | 91.3 ± 1.9 (10) | 96.4 ± 1.0 (10) |
| JB-HAM                   | F <sub>1</sub> (EE × JB) | BC(JB × F <sub>1</sub> (EE×JB)) | 11 | 8 | 6 | 51.5 [25–78] (11)  | 99.2 ± 0.4 (11)   | 95.2 ± 1.1 (11) | 99.5 ± 0.3 (11) |
| EE-HEL                   | F <sub>1</sub> (EE × JB) | BC(EE × F <sub>1</sub> (EE×JB)) | 10 | 5 | 5 | 57.9 [37–90] (10)  | 99.8 ± 0.2 (10)   | 93.0 ± 2.4 (10) | 99.8 ± 0.2 (10) |
| F <sub>1</sub> (JB × WE) | JB-HAM                   | BC(F <sub>1</sub> (JB×WE) × JB) | 11 | 5 | 7 | 71.2 [51–97] (11)  | 99.3 ± 0.7 (11)   | 95.8 ± 1.3 (11) | 98.7 ± 0.4 (11) |
| F <sub>1</sub> (JB × WE) | WE-BRU                   | BC(F <sub>1</sub> (JB×WE) × WE) | 11 | 5 | 5 | 65.6 [46–97] (11)  | 100.0 ± 0.0 (11)  | 95.5 ± 1.2 (11) | 98.8 ± 0.4 (11) |
| JB-HAM                   | F <sub>1</sub> (JB × WE) | BC(JB × F <sub>1</sub> (JB×WE)) | 10 | 6 | 5 | 70.3 [29–130] (10) | 98.5 ± 0.8 (10)   | 91.4 ± 2.2 (10) | 99.4 ± 0.3 (10) |
| WE-BRU                   | F <sub>1</sub> (JB × WE) | BC(WE × F <sub>1</sub> (JB×WE)) | 10 | 5 | 5 | 62.9 [47–79] (10)  | 98.1 ± 0.8 (10)   | 93.5 ± 1.7 (10) | 97.8 ± 1.0 (10) |
| F <sub>1</sub> (WE × JB) | JB-HAM                   | BC(F <sub>1</sub> (WE×JB) × JB) | 11 | 6 | 7 | 59.3 [39–112] (11) | 99.6 ± 0.3 (11)   | 92.7 ± 1.9 (11) | 98.6 ± 0.7 (11) |
| F <sub>1</sub> (WE × JB) | WE-BRU                   | BC(F <sub>1</sub> (WE×JB) × WE) | 10 | 5 | 7 | 49.8 [30–62] (10)  | 99.8 ± 0.2 (10)   | 96.0 ± 1.4 (10) | 97.4 ± 0.9 (10) |
| JB-HAM                   | F <sub>1</sub> (WE × JB) | BC(JB × F <sub>1</sub> (WE×JB)) | 11 | 7 | 5 | 57.6 [29–92] (11)  | 98.5 ± 0.9 (11)   | 91.2 ± 2.2 (11) | 98.8 ± 0.4 (11) |
| WE-BRU                   | F <sub>1</sub> (WE × JB) | BC(WE × F <sub>1</sub> (WE×JB)) | 10 | 5 | 5 | 61.7 [35–83] (10)  | 99.7 ± 0.2 (10)   | 92.3 ± 2.6 (10) | 99.2 ± 0.4 (10) |
| F <sub>1</sub> (EE × WE) | EE-HEL                   | BC(F <sub>1</sub> (EE×WE) × EE) | 7  | 3 | 3 | 46.1 [27–66] (7)   | 100.0 ± 0.0 (7)   | 94.6 ± 1.7 (7)  | 94.4 ± 4.4 (7)  |
| F <sub>1</sub> (EE × WE) | WE-BRU                   | BC(F <sub>1</sub> (EE×WE) × WE) | 7  | 3 | 3 | 42.0 [17–62] (7)   | 100.0 ± 0.0 (7)   | 96.8 ± 1.2 (7)  | 92.5 ± 5.4 (7)  |
| EE-HEL                   | F <sub>1</sub> (EE × WE) | BC(EE × F <sub>1</sub> (EE×WE)) | 7  | 3 | 4 | 35.6 [18–51] (7)   | 100.0 ± 0.0 (7)   | 88.7 ± 4.5 (7)  | 98.7 ± 0.6 (7)  |
| WE-BRU                   | F <sub>1</sub> (EE × WE) | BC(WE × F <sub>1</sub> (EE×WE)) | 7  | 3 | 4 | 36.9 [30–49] (7)   | 99.6 ± 0.4 (7)    | 97.5 ± 0.8 (7)  | 95.5 ± 2.9 (7)  |
| F <sub>1</sub> (WE × EE) | EE-HEL                   | BC(F <sub>1</sub> (WE×EE) × EE) | 8  | 4 | 3 | 48.8 [27–73] (8)   | 100.0 ± 0.0 (8)   | 95.5 ± 2.2 (8)  | 99.0 ± 0.8 (8)  |
| F <sub>1</sub> (WE × EE) | WE-BRU                   | BC(F <sub>1</sub> (WE×EE) × WE) | 8  | 4 | 3 | 39.0 [16–70] (8)   | 100.0 ± 0.0 (8)   | 98.5 ± 0.7 (8)  | 99.7 ± 0.3 (8)  |
| EE-HEL                   | F <sub>1</sub> (WE × EE) | BC(EE × F <sub>1</sub> (WE×EE)) | 7  | 3 | 4 | 39.0 [20–58] (7)   | 100.0 ± 0.0 (7)   | 87.8 ± 4.0 (7)  | 98.7 ± 1.3 (7)  |
| WE-BRU                   | F <sub>1</sub> (WE × EE) | BC(WE × F <sub>1</sub> (WE×EE)) | 7  | 3 | 4 | 38.6 [21–58] (7)   | 100.0 ± 0.0 (7)   | 92.6 ± 2.2 (7)  | 97.9 ± 1.1 (7)  |

The number of families is shown in parentheses. Significantly different from both parental populations at  $P < 0.01^{**}$  or  $P < 0.001^{***}$ .

†Wild-caught individuals are counted as different families. Hatching and larval survival rates are represented based on fertilized and hatched eggs, respectively.
