# Supplementary material for: The evolution of sex determination associated with a chromosomal inversion
Source: PubMed Central journal article supplement (PMC6329827; doi:10.1038/s41467-018-08014-y), 2019-01-11
Supplement: 41467_2018_8014_MOESM2_ESM.pdf [file 41467_2018_8014_MOESM2_ESM.pdf]

## Description of Additional Supplementary Files

**File Name:** Supplementary Data 1

**Description:** STR markers used in this study and their locations in the *G. aculeatus* genome.

**File Name:** Supplementary Data 2

**Description:** Genetic variation and male-specific alleles at 35 *G. aculeatus* Chr12 loci in 13 *Pungitius* populations.
